# Supplementary material for: Myoglobin clearance with continuous veno-venous hemodialysis using high cutoff dialyzer versus continuous veno-venous hemodiafiltration using high-flux dialyzer: a prospective randomized controlled trial
Source: Springer Nature journal article supplement (doi:10.1186/s13054-020-03366-8), 2020-11-11
Supplement: MOESM1 [file 18577304]

**Additional file 1: Dialysis protocol**

| <b>Variable</b>  | <b>Calculated<br/>BF</b> | <b>Calculated<br/>TTR</b> | <b>BF<br/>T0 (1h)</b> | <b>BF<br/>T1 (6h)</b> | <b>BF<br/>T2 (12h)</b> | <b>BF<br/>T3 (24h)</b> | <b>BF<br/>T4 (48h)</b> | <b>TTR<br/>T0 (1h)</b> | <b>TTR<br/>T1 (6h)</b> | <b>TTR<br/>T2 (12h)</b> | <b>TTR<br/>T3 (24h)</b> | <b>TTR<br/>T4 (48h)</b> |
|------------------|--------------------------|---------------------------|-----------------------|-----------------------|------------------------|------------------------|------------------------|------------------------|------------------------|-------------------------|-------------------------|-------------------------|
| <b>CVVHDF</b>    | 69.36±14.06              | 2039.98±398.56            | 86.36±23              | 88.06±23              | 88±22                  | 87.41±19               | 88.1±21                | 2116±328               | 2101±315               | 2137±327                | 2133±302                | 2111±334                |
| <b>CVVHD-HCO</b> | 91.18±19.19              | 1814.76±379.47            | 91.71±18              | 91.76±18              | 93.44±18               | 93.55±18               | 90.69±16               | 1821±351               | 1803±396               | 1895±346                | 1879±370                | 1816±355                |
| <b>P value</b>   | <0.05                    | 0.020                     | 0.300                 | 0.485                 | 0.301                  | 0.229                  | 0.643                  | 0.001                  | 0.002                  | 0.008                   | 0.008                   | 0.010                   |

Data presented as mean ± standard deviation. *BF* blood flow (ml/min), *TTR* total turnover rate (ml/h), *CVVHDF* continuous veno-venous hemodiafiltration, *CVVHD-HCO* continuous veno-venous hemodialysis using high cut-off filter.
