# Supplementary material for: Myoglobin clearance with continuous veno-venous hemodialysis using high cutoff dialyzer versus continuous veno-venous hemodiafiltration using high-flux dialyzer: a prospective randomized controlled trial
Source: Springer Nature journal article supplement (doi:10.1186/s13054-020-03366-8), 2020-11-11
Supplement: MOESM3 [file 18577304]

**Additional file 3: Substance specific clearances (ml/min) at different time points**

| <b>End-points</b>       | <b>Time after starting treatment</b> | <b>n</b> | <b>Control arm<br/>CVVHDF</b> | <b>Intervention arm<br/>CVVHD-HCO</b> | <b>P value</b> |
|-------------------------|--------------------------------------|----------|-------------------------------|---------------------------------------|----------------|
| <b>Myoglobin</b>        | <b>1h</b>                            | 66       | 3.7 [2.3, 4.7]                | 12.3 [10.1, 14.4]                     | <0.001         |
|                         | <b>6h</b>                            | 65       | 3.4 [1.6, 3.9]                | 10 [8.3, 12.7]                        | <0.001         |
|                         | <b>12h</b>                           | 62       | 2.3 [1.5, 4]                  | 8.3 [6.7, 10.7]                       | <0.001         |
|                         | <b>24h</b>                           | 57       | 1.9 [0.2, 3.1]                | 8.2 [6.8, 10.3]                       | <0.001         |
|                         | <b>48h</b>                           | 48       | 2.1 [0.1, 5.5]                | 6.9 [5.1, 8.8]                        | <0.001         |
| <b>Urea</b>             | <b>1h</b>                            | 66       | 28.7 [25.6, 33.2]             | 24.8 [20.9, 28.7]                     | 0.005          |
|                         | <b>6h</b>                            | 65       | 29.6 [25, 31.4]               | 25.1 [22.8, 28.3]                     | 0.025          |
|                         | <b>12h</b>                           | 62       | 28.8 [25.2, 32.9]             | 26.1 [19.8, 28.8]                     | 0.008          |
|                         | <b>24h</b>                           | 57       | 28.6 [25.8, 32.4]             | 26.7 [20.9, 29.7]                     | 0.106          |
|                         | <b>48h</b>                           | 48       | 31 [26.2, 32.8]               | 23 [20.4, 30.9]                       | 0.031          |
| <b>Creatinin</b>        | <b>1h</b>                            | 66       | 31.4 [27.6, 35.9]             | 28.5 [24.7, 34.1]                     | 0.094          |
|                         | <b>6h</b>                            | 65       | 31.7 [27.2, 34.5]             | 29.5 [25.3, 34.9]                     | 0.227          |
|                         | <b>12h</b>                           | 62       | 31.1 [27.8, 34.8]             | 29.5 [22.5, 33]                       | 0.111          |
|                         | <b>24h</b>                           | 58       | 31.5 [28, 37.1]               | 30.4 [24.6, 35.9]                     | 0.299          |
|                         | <b>48h</b>                           | 48       | 32,9 [27.5, 36.5]             | 25.7 [23.7, 34.7]                     | 0.083          |
| <b>62-Microglobulin</b> | <b>1h</b>                            | 66       | 21.1 [18, 23.8]               | 24.5 [19.2, 28.1]                     | 0.053          |
|                         | <b>6h</b>                            | 65       | 19 [17.1, 22.4]               | 24.1 [21, 26.6]                       | <0.001         |
|                         | <b>12h</b>                           | 62       | 7.8 [4.5, 10.9]               | 22.7 [18.2, 24.5]                     | <0.001         |
|                         | <b>24h</b>                           | 57       | 16.4 [15.5, 19.4]             | 22.1 [19.2, 25.8]                     | <0.001         |
|                         | <b>48h</b>                           | 48       | 18 [15.5, 20.4]               | 21.4 [16.9, 23.7]                     | 0.063          |
| <b>Interleukin-6</b>    | <b>1h</b>                            | 66       | 0.2 [-0.9, 1.2]               | 5 [2.4, 5.9]                          | <0.001         |
|                         | <b>6h</b>                            | 65       | 0.3 [-1, 2.5]                 | 2.5 [1, 3.5]                          | 0.007          |
|                         | <b>12h</b>                           | 62       | 1.2 [0, 3.7]                  | 1.8 [0.6, 3.4]                        | 0.573          |
|                         | <b>24h</b>                           | 57       | -0.6 [-1.3, 1.5]              | 1.6 [0.4, 3]                          | 0.009          |
|                         | <b>48h</b>                           | 48       | 0.7 [-1.1, 4.2]               | 1.3 [0, 2.3]                          | 0.640          |
| <b>Albumin</b>          | <b>1h</b>                            | 66       | -3.4 [-4.2, -1.1]             | -1.2 [-2.6, 0.3]                      | 0.020          |
|                         | <b>6h</b>                            | 65       | -2.1 [-3.5, 0.3]              | -1.4 [-3, -0.2]                       | 0.511          |
|                         | <b>12h</b>                           | 62       | -1.4 [-2.9, 1.7]              | -1.7 [-3.1, -0.1]                     | 0.799          |
|                         | <b>24h</b>                           | 57       | -2.3 [-4.5, -0.8]             | -1.6 [-3.2, -0.7]                     | 0.443          |
|                         | <b>48h</b>                           | 48       | -1.7 [-5.7, 1.2]              | -2.4 [-5, -0.8]                       | 0.424          |

Data presented as Median [25<sup>th</sup>, 75<sup>th</sup> quantile]. *ml/min* milliliters per minute, *CVVHDF* continuous veno-venous hemodiafiltration, *CVVHD-HCO* continuous veno-venous hemodialysis using high cut-off filter
